# Supplementary material for: Inflammation shapes pathogenesis of murine arrhythmogenic cardiomyopathy
Source: PubMed Central journal article supplement (PMC7289786; doi:10.1007/s00395-020-0803-5), 2020-06-12
Supplement: 395_2020_803_MOESM1_ESM.pdf [file 395_2020_803_MOESM1_ESM.pdf]

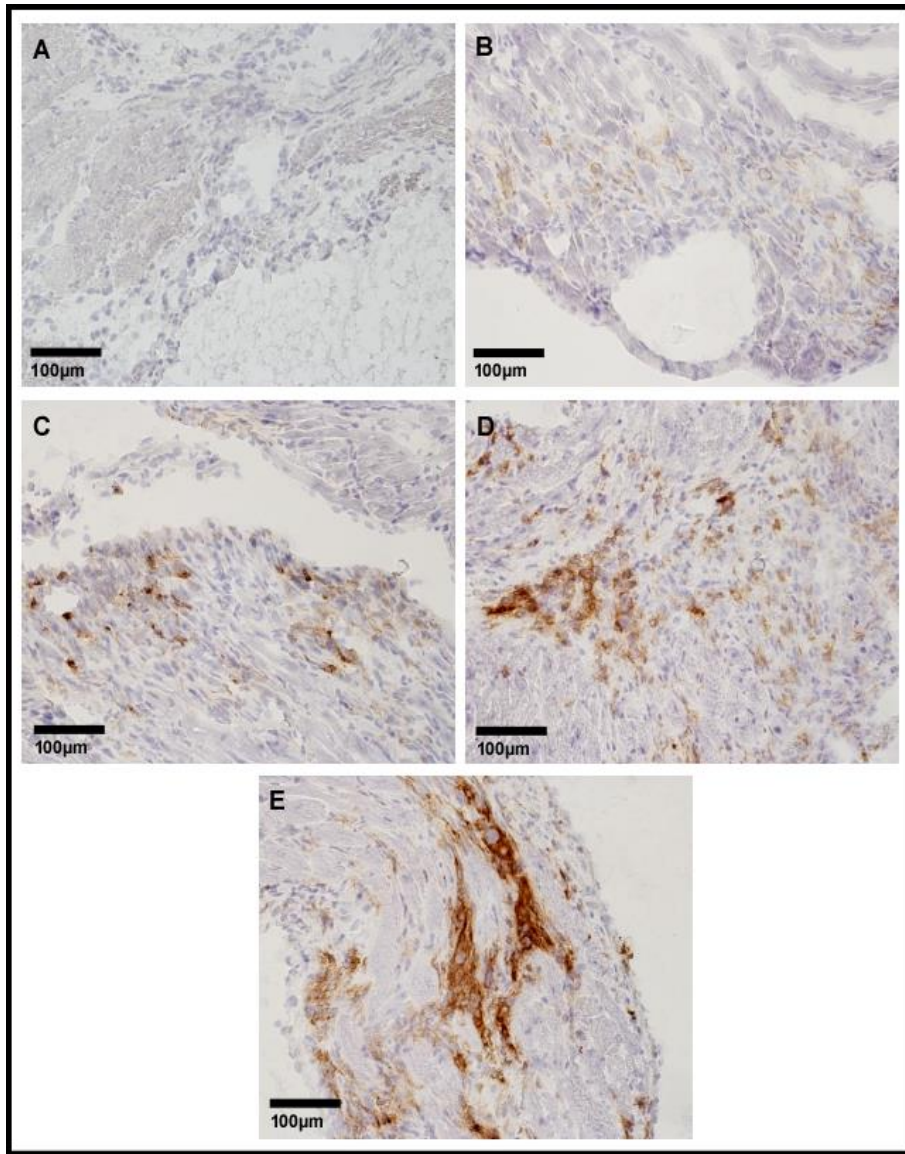

**Supplementary Fig. 1** The immunohistochemical images illustrate the semiquantitative score of immunoreactions. The micrographs show CD11b immunostaining in scar tissue of 4-12 week-old *Dsg2<sup>MT</sup>* hearts. The score was assigned on a scale from 0 to 4: (A) 0 = no or few weakly stained cells; (B) 1 = some scattered and weakly stained cells; (C) 2 = few scattered and strongly stained cells; (D) 3 = many strongly stained cells; and (E) 4 = many tightly packed and strongly stained cells. The figure is taken from the MD thesis of Svenja van der Gaag (2017).

**Supplementary Table 1.** Ventricle-specific cytokine, chemokine and chemokine receptor mRNA expression in *Dsg2<sup>CKO</sup>* mice at 18-19 days prior to overt lesion formation (see corresponding Fig. 1)

|                     | Left ventricle                        |                                      |        | Right ventricle                     |                                      |        |
|---------------------|---------------------------------------|--------------------------------------|--------|-------------------------------------|--------------------------------------|--------|
|                     | <i>Dsg2<sup>loxP</sup></i><br>n = 4-5 | <i>Dsg2<sup>CKO</sup></i><br>n = 4-5 | P      | <i>Dsg2<sup>loxP</sup></i><br>n = 4 | <i>Dsg2<sup>CKO</sup></i><br>n = 4-5 | P      |
| <b><i>Ccl2</i></b>  | 1.00 ± 0.29                           | 3.03 ± 2.56                          | 0.0543 | 1.00 ± 0.55                         | 41.71 ± 86.01                        | 0.0635 |
| <b><i>Ccr2</i></b>  | 1.00 ± 0.45                           | 1.91 ± 1.15                          | 0.1143 | 1.33 ± 1.39 <sup>§</sup>            | 3.60 ± 2.83                          | 0.3929 |
| <b><i>Ccl3</i></b>  | 1.00 ± 0.50                           | 2.30 ± 1.98                          | 0.4762 | 1.00 ± 0.52                         | 22.42 ± 30.57                        | 0.0159 |
| <b><i>Ccr5</i></b>  | 1.00 ± 0.28                           | 1.56 ± 1.49                          | 0.8548 | 0.99 ± 0.31                         | 3.65 ± 2.26                          | 0.0317 |
| <b><i>Tnfα</i></b>  | 1.00 ± 0.16                           | 1.54 ± 0.95                          | 0.1905 | 1.00 ± 0.51                         | 8.82 ± 12.9                          | 0.2701 |
| <b><i>Il 18</i></b> | 1.00 ± 0.59                           | 2.67 ± 2.17                          | 0.1111 | 1.00 ± 0.51                         | 25.44 ± 47.8                         | 0.0714 |
| <b><i>Il10</i></b>  | 0.99 ± 0.84                           | 1.04 ± 0.47                          | 0.6631 | 1.00 ± 0,37                         | 5.83 ± 3.78                          | 0.0159 |

NRQs are given as mean ± standard deviation. The Mann Whitney U test was applied to compare mRNA expression between *Dsg2<sup>CKO</sup>* and *Dsg2<sup>loxP</sup>* control mice. \* p <0.05; \*\* p <0.01. <sup>§</sup> n =3, because one sample generated no RT-PCR signal.

**Supplementary Table 2.** Cardiac cytokine, chemokine and chemokine receptor mRNA expression in 2 week-old *Dsg2<sup>MT</sup>* mice at inflammation onset (see corresponding Fig. 2A)

| Total heart                  |                                   |                                   |                                       |        |
|------------------------------|-----------------------------------|-----------------------------------|---------------------------------------|--------|
|                              | <i>Dsg2<sup>WT</sup></i><br>n = 3 | <i>Dsg2<sup>MT</sup></i><br>n = 6 | <i>Dsg2<sup>MT</sup> Ph+</i><br>n = 5 | P      |
| <i>Ccl2</i> <sup>&amp;</sup> | 1 ± 0.50                          | 2.27 ± 2.49                       | 21.27 ± 18.91 <sup>2*</sup>           | 0.0381 |
| <i>Ccr2</i> <sup>&amp;</sup> | 1 ± 0.31                          | 1.26 ± 0.58                       | 22.45 ± 23.8 <sup>2*</sup>            | 0.0103 |
| <i>Ccl3</i> <sup>&amp;</sup> | 1 ± 0.02                          | 2.70 ± 1.23                       | 124 ± 129 <sup>2**</sup>              | 0,0034 |
| <i>Ccr5</i> <sup>&amp;</sup> | 1 ± 0.1                           | 1.63 ± 0.63                       | 14.79 ± 9.62 <sup>2*</sup>            | 0,0098 |
|                              | <i>Dsg2<sup>WT</sup></i><br>n = 3 | <i>Dsg2<sup>MT</sup></i><br>n = 3 | <i>Dsg2<sup>MT</sup> Ph+</i><br>n = 4 | P      |
| <i>Spp1</i> <sup>§</sup>     | 0 ± 0.001                         | 0.013 ± 0.015                     | 3.38 ± 3.62 <sup>4*</sup>             | 0.0139 |

<sup>&</sup>Values are given as mean ± standard deviation as NRQ. The Kruskal Wallis test with selected Dunn's Multiple comparison tests as post hoc test were applied.

<sup>1</sup> *Dsg2<sup>WT</sup>* versus *Dsg2<sup>MT</sup>*

<sup>2</sup> *Dsg2<sup>WT</sup>* versus *Dsg2<sup>MT</sup> Ph+*

\* p < 0.05; \*\* p < 0.01

<sup>§</sup>Values are given as mean ± standard deviation as *Spp1/Hmbs* ratio. The Kruskal Wallis test with selected Dunn's Multiple comparison tests as post hoc test were applied.

<sup>3</sup> *Dsg2<sup>WT</sup>* versus *Dsg2<sup>MT</sup>*

<sup>4</sup> *Dsg2<sup>WT</sup>* versus *Dsg2<sup>MT</sup> Ph+*

\* p < 0.05

**Supplementary Table 3.** Left ventricular chemokine and chemokine receptor mRNA expression in 18-19 days-old *Dsg2<sup>CKO</sup>* mice at the onset of inflammation (see corresponding Fig. 2 B)

|                                  | Left ventricle                      |                                    |                                        | P      |
|----------------------------------|-------------------------------------|------------------------------------|----------------------------------------|--------|
|                                  | <i>Dsg2<sup>loxP</sup></i><br>n = 9 | <i>Dsg2<sup>CKO</sup></i><br>n = 9 | <i>Dsg2<sup>CKO</sup></i> Ph+<br>n = 4 |        |
| <b><i>Ccl7</i></b>               | 1.00 ± 0.78                         | 7.20 ± 18.28                       | 22.9 ± 17.53                           | 0.0773 |
| <b><i>Ccl12</i></b>              | 0.99 ± 0.33                         | 2.29 ± 3.20                        | 4.22 ± 2.92                            | 0.2445 |
| <b><i>Cxcl5</i></b>              | 0.99 ± 0.58                         | 20.95 ± 52.74                      | 31.94 ± 27.42 <sup>§**</sup>           | 0.0105 |
| <b><i>Cxcr2</i></b>              | 0.99 ± 2.112                        | 4.36 ± 6.53                        | 4.07 ± 4.29                            | 0.0808 |
| <b><i>Cxcl10</i></b>             | 1.00 ± 0.19                         | 2.72 ± 2.24                        | 11.84 ± 11.92 <sup>§**</sup>           | 0.0105 |
| <b><i>Cxcr3</i></b>              | 1.00 ± 1.095                        | 2.04 ± 2.84                        | 3.23 ± 1.59                            | 0.0928 |
| <b><i>Cx3cl1</i></b>             | 0.99 ± 0.34                         | 1.00 ± 0.39                        | 1.64 ± 0.38 <sup>§*</sup>              | 0.0473 |
| <b><i>Cx3cr1<sup>X</sup></i></b> | 0.99 ± 0.29                         | 0.76 ± 0.24                        | 1.43 ± 0.16                            | 0.0358 |
| <b><i>Cxcr4</i></b>              | 1.00 ± 0.37                         | 0.94 ± 0.37                        | 2.04 ± 0.72 <sup>§*</sup>              | 0.0202 |
| <b><i>Ccr3</i></b>               | 0.99 ± 0.74                         | 5.52 ± 7.73 <sup>&amp;*</sup>      | 3.13 ± 3.05                            | 0.0396 |

NRQs are given as mean ± standard deviation. The Kruskal Wallis test with selected Dunn's Multiple comparison tests as post hoc tests were applied.

& *Dsg2<sup>loxP</sup>* versus *Dsg2<sup>CKO</sup>*

§ *Dsg2<sup>loxP</sup>* versus *Dsg2<sup>CKO</sup>* Ph+

\* p < 0.05; \*\* p < 0.01

<sup>X</sup> *Dsg2<sup>loxP</sup>* (n = 4); *Dsg2<sup>CKO</sup>* (n = 3); *Dsg2<sup>CKO</sup>* Ph+ (n = 4)

**Supplementary Table 4.** Right ventricular chemokine and chemokine receptor mRNA expression in 18-19 days-old *Dsg2<sup>CKO</sup>* mice at the onset of inflammation. (see corresponding Fig. 2 B)

|                      | Right ventricle                     |                                     |                                        | P      |
|----------------------|-------------------------------------|-------------------------------------|----------------------------------------|--------|
|                      | <i>Dsg2<sup>loxP</sup></i><br>n = 8 | <i>Dsg2<sup>CKO</sup></i><br>n = 10 | <i>Dsg2<sup>CKO</sup> Ph+</i><br>n = 4 |        |
| <b><i>Ccl7</i></b>   | 1.00 ± 0.59                         | 48.88 ± 133.7                       | 25.66 ± 31.32 <sup>§*</sup>            | 0.0565 |
| <b><i>Ccl12</i></b>  | 1.00 ± 0.89                         | 2.51 ± 5.34                         | 1.82 ± 1.75                            | 0.6426 |
| <b><i>Cxcl5</i></b>  | 1.00 ± 0.81                         | 52.63 ± 144.7                       | 23.81 ± 26.98 <sup>§*</sup>            | 0.0465 |
| <b><i>Cxcr2</i></b>  | 1.00 ± 1.01                         | 32.78 ± 79.66                       | 31.28 ± 33.26 <sup>§*</sup>            | 0.0520 |
| <b><i>Cxcl10</i></b> | 0.99 ± 0.45                         | 11.4 ± 27.07                        | 14.94 ± 16.74                          | 0.1551 |
| <b><i>Cxcr3</i></b>  | 1.00 ± 0.39                         | 2.16 ± 2.24                         | 13.33 ± 15.83 <sup>§*</sup>            | 0.0250 |
| <b><i>Cx3cl1</i></b> | 1.00 ± 0.54                         | 1.21 ± 0.54                         | 1.79 ± 1.16                            | 0.3083 |
| <b><i>Cx3cr1</i></b> | 1.00 ± 0.60                         | 1.03 ± 0.78                         | 3.93 ± 3.70                            | 0.0474 |
| <b><i>Cxcr4</i></b>  | 1.00 ± 0.93                         | 1.11 ± 0.77                         | 2.38 ± 1.68                            | 0.2224 |
| <b><i>Ccr3</i></b>   | 1.00 ± 0.42                         | 10.43 ± 13.72                       | 27.59 ± 22.18 <sup>§**</sup>           | 0.0048 |

NRQs are given as mean ± standard deviation. The Kruskal Wallis test with selected Dunn's Multiple comparison tests as post hoc tests were applied.

<sup>&</sup> *Dsg2<sup>loxP</sup>* versus *Dsg2<sup>CKO</sup>*

<sup>§</sup> *Dsg2<sup>loxP</sup>* versus *Dsg2<sup>CKO</sup> Ph+*

\* p < 0.05; \*\* p < 0.01

**Supplementary Table 5.** Inflammatory and anti-inflammatory cytokine mRNA expression during the acute disease phase in *Dsg2<sup>MT</sup>* mice (see corresponding Fig. 4)

|               |          | Total heart              |                          |        |
|---------------|----------|--------------------------|--------------------------|--------|
|               |          | <i>Dsg2<sup>WT</sup></i> | <i>Dsg2<sup>MT</sup></i> | P      |
| <i>Tnfα</i>   | 4 weeks  | 0.69 ± 0.33              | 2.38 ± 1.77              | 0.026  |
|               | 12 weeks | 0.77 ± 0.14              | 1.24 ± 0.49              | 0.0348 |
| <i>Il 1β</i>  | 4 weeks  | 0.32 ± 0.07              | 3.28 ± 2.88              | 0.0022 |
|               | 12 weeks | 0.43 ± 0.25              | 1.15 ± 0.50              | 0.0070 |
| <i>Il10</i>   | 4 weeks  | 2.91 ± 2.31              | 11.84 ± 6.61             | 0.0043 |
|               | 12 weeks | 0.31 ± 0.13              | 0.44 ± 0.145             | 0.0407 |
| <i>Lgals3</i> | 4 weeks  | 0.22 ± 0.004             | 2.91 ± 3.18              | 0.0037 |
|               | 12 weeks | 0.16 ± 0.07              | 1.71 ± 0.66              | 0.0021 |

Values are given as mean ± standard deviation in arbitrary units (target / housekeeping gene ratio). The Mann Whitney U test was applied to compare mRNA expression between wildtype and mutants at each time point in total ventricular samples. 4 week-old mice: n = 6 and 12 week-old mice: n = 7.

**Supplementary Table 6:** Chemokine and chemokine receptor mRNA expression during the acute and chronic disease phase in left and right ventricles of *Dsg2<sup>MT</sup>* mice (see corresponding Fig. 6).

|                                 |             | Left ventricle           |                              | Right ventricle          |                                |
|---------------------------------|-------------|--------------------------|------------------------------|--------------------------|--------------------------------|
|                                 |             | <i>Dsg2<sup>WT</sup></i> | <i>Dsg2<sup>MT</sup></i>     | <i>Dsg2<sup>WT</sup></i> | <i>Dsg2<sup>MT</sup></i>       |
| <b><i>Ccl7</i></b>              | 4 weeks     | 0.41 ± 0.15              | 1.23 ± 1.32                  | 0.29 ± 0.12              | 0.57 ± 0.60                    |
|                                 | 11-14 weeks | 0.60 ± 0.20              | 1.21 ± 0.86                  | 0.15 ± 0.06              | 0.30 ± 0.07**                  |
|                                 | 32 weeks    | 513.4 ± 249              | 789 ± 194                    | 472 ± 190.1              | 736 ± 298                      |
| <b><i>Ccl12</i></b>             | 4 weeks     | 0.18 ± 0.09              | 0.19 ± 0.1                   | 0.14 ± 0.08              | 0.14 ± 0.07                    |
|                                 | 11-14 weeks | 0.07 ± 0.11              | 0.36 ± 0.42                  | 0.021 ± 0.008            | 0.116 ± 0.052*                 |
|                                 | 32 weeks    | 43.15 ± 23.9             | 78.6 ± 73.1                  | 27.0 ± 9.1               | 79.5 ± 48.4*                   |
| <b><i>Cx3cl1</i></b>            | 4 weeks     | 1.4 ± 0.38               | 3.71 ± 1.69**                | 1.17 ± 0.47              | 4.28 ± 1.91**                  |
|                                 | 11-14 weeks | 1.92 ± 0.29              | 3.27 ± 1.22 <sup>§</sup>     | 2.10 ± 0.58              | 5.72 ± 2.33**                  |
|                                 | 32 weeks    | 1046 ± 367               | 1480 ± 588                   | 958 ± 220                | 2536 ± 882**                   |
| <b><i>Cxcl5</i></b>             | 4 weeks     | 0.046 ± 0.048            | 0.318 ± 0.344*               | 0.067 ± 0.038            | 0.912 ± 1.038*                 |
|                                 | 11-14 weeks | 0.049 ± 0.027            | 0.119 ± 0.089                | 0.054 ± 0.035            | 0.172 ± 0.113 <sup>&amp;</sup> |
| <b><i>Cxcl10</i></b>            | 4 weeks     | 0.18 ± 0.11              | 0.67 ± 0.83                  | 0.128 ± 0.14             | 0.298 ± 0.283                  |
|                                 | 11-14 weeks | 0.236 ± 0.368            | 0.694 ± 1.09                 | 0.076 ± 0.016            | 0.228 ± 0.064**                |
|                                 | 32 weeks    | 123.2 ± 37.45            | 93.84 ± 37.7                 | 142 ± 68.46              | 109 ± 30.23                    |
| <b><i>Cx3cr1</i></b>            | 4 weeks     | 0.09 ± 0.04              | 0.20 ± 0.14 <sup>§</sup>     | 0.11 ± 0.05              | 0.31 ± 0.22 <sup>§</sup>       |
|                                 | 11-14 weeks | 0.018 ± 0.006            | 0.029 ± 0.017                | 0.011 ± 0.005            | 0.048 ± 0.024**                |
| <b><i>Cxcr2<sup>1</sup></i></b> | 4 weeks     | 2.92 ± 1.94              | 10.36 ± 10.3                 | 5.47 ± 2.78              | 24.97 ± 22.95*                 |
|                                 | 11-14 weeks | 3.27 ± 2.58              | 4.01 ± 3.91                  | 9.17 ± 11.78             | 16.86 ± 7.67                   |
| <b><i>Cxcr3<sup>1</sup></i></b> | 4 weeks     | 21.28 ± 8.36             | 70.41 ± 53.66                | 21.89 ± 12.68            | 107.7 ± 71.1**                 |
|                                 | 11-14 weeks | 18.10 ± 8.87             | 31.76 ± 8.30*                | 19.86 ± 7.57             | 85.32 ± 41.36**                |
| <b><i>Cxcr4</i></b>             | 4 weeks     | 0.26 ± 0.09              | 0.53 ± 0.41*                 | 0.181 ± 0.041            | 0.677 ± 0.52**                 |
|                                 | 11-14 weeks | 0.26 ± 0.21              | 0.11 ± 0.13                  | 0.11 ± 0.054             | 0.186 ± 0.088                  |
| <b><i>Ccl2</i></b>              | 32 weeks    | 455 ± 307                | 943 ± 326                    | 415 ± 123                | 877 ± 421*                     |
| <b><i>Ccl3</i></b>              | 32 weeks    | 307 ± 278                | 242 ± 143                    | 167.5 ± 70.3             | 513.5 ± 266 <sup>&amp;</sup>   |
| <b><i>Ccr2</i></b>              | 32 weeks    | 2.93 ± 0.91              | 5.26 ± 2.11 <sup>&amp;</sup> | 1.5 ± 0.62               | 2.78 ± 1.27 <sup>§</sup>       |
| <b><i>Ccr5</i></b>              | 32 weeks    | 60.2 ± 40.6              | 71.8 ± 30.3                  | 64.2 ± 39.2              | 80.1 ± 34.9                    |

Values are given as mean ± standard deviation in arbitrary units (target / housekeeping gene ratio). The Mann Whitney U test was applied to compare mRNA expression between wildtype and mutants at each time point in total ventricular samples. \* p < 0.05; \*\* p < 0.01, <sup>§</sup> p = 0.0519, <sup>&</sup> p = 0.0556; <sup>§</sup> p = 0.0952. The mRNA expression was assessed in left and right ventricular samples of 5 *Dsg2<sup>WT</sup>* and 6 *Dsg2<sup>MT</sup>* mice aged 4 weeks, in 4-6 *Dsg2<sup>WT</sup>* and 5-6 *Dsg2<sup>MT</sup>* mice aged 11-14 weeks and in 5 *Dsg2<sup>WT</sup>* and 4-5 *Dsg2<sup>MT</sup>* mice aged 29-35 weeks.

<sup>1</sup> Obtained values were multiplied with 10 000.

**Supplementary Table 7.** Immune cell marker mRNA expression during the acute and chronic disease phase in left and right ventricles of *Dsg2<sup>MT</sup>* mice (see corresponding Figs. 6 and 7)

|                            |             | Left ventricle           |                              | Right ventricle          |                           |
|----------------------------|-------------|--------------------------|------------------------------|--------------------------|---------------------------|
|                            |             | <i>Dsg2<sup>WT</sup></i> | <i>Dsg2<sup>MT</sup></i>     | <i>Dsg2<sup>WT</sup></i> | <i>Dsg2<sup>MT</sup></i>  |
| <b><i>Cd45</i></b>         | 4 weeks     | 0.48 ± 0.22              | 2.64 ± 2.56*                 | 0.61 ± 0.68              | 3.63 ± 3.46*              |
|                            | 11-14 weeks | 1.93 ± 0.82              | 3.31 ± 1.74 <sup>&amp;</sup> | 0.73 ± 0.22              | 2.38 ± 1.55**             |
|                            | 32 weeks    | 1.10 ± 0.34              | 1.75 ± 0.53 <sup>&amp;</sup> | 0.36 ± 0.11              | 0.89 ± 0.25**             |
| <b><i>Cd68</i></b>         | 4 weeks     | 0.05 ± 0.007             | 0.29 ± 0.25**                | 0.57 ± 0.23              | 2,66.32 ± 3.57**          |
|                            | 11-14 weeks | 0.0446 ± 0.006           | 0.103 ± 0.053**              | 0.051 ± 0.004            | 0.19 ± 0.049**            |
|                            | 32 weeks    | 0.062 ± 0.01             | 0.153 ± 0.061**              | 0.064 ± 0.007            | 0.16 ± 0.04**             |
| <b><i>F4/80 (Emr1)</i></b> | 4 weeks     | 1.92 ± 0.57              | 9.57 ± 9.50**                | 1.61 ± 0.35              | 16.10 ± 17.82*            |
|                            | 11-14 weeks | 2.36 ± 0.46              | 4.12 ± 1.70*                 | 0.59 ± 0.12              | 1.34 ± 0.42**             |
|                            | 32 weeks    | 1.06 ± 0.25              | 1.97 ± 0.36**                | 0.13 ± 0.03              | 0.28 ± 0.04**             |
| <b><i>Cd3</i></b>          | 4 weeks     | 1.074 ± 0.322            | 2.49 ± 0.677**               | 0.74 ± 0.52              | 4.39 ± 2.99**             |
|                            | 11-14 weeks | 0.35 ± 0.32              | 0.72 ± 0.34                  | 0.42 ± 0.30              | 2.089 ± 0.97**            |
|                            | 32 weeks    | 0.75 ± 0.34              | 1.99 ± 0.48**                | 0.38 ± 0.31              | 2.15 ± 1.97*              |
| <b><i>Ym1</i></b>          | 4 weeks     | 0.44 ± 0.24              | 13.66 ± 24.88                | 0.95 ± 0.73              | 33.64 ± 41.42*            |
|                            | 11-14 weeks | 0.24 ± 0.14              | 2.41 ± 4.90                  | 0.33 ± 0.31              | 0.69 ± 0.55 <sup>§</sup>  |
|                            | 32 weeks    | 0.08 ± 0.04              | 0.19 ± 0.07*                 | 0.08 ± 0.09              | 0.18 ± 0.06 <sup>§</sup>  |
| <b><i>Mmp12</i></b>        | 4 weeks     | 0.011 ± 0.007            | 0.65 ± 0.40**                | 0.01 ± 0.004             | 0.59 ± 0.54**             |
|                            | 11-14 weeks | 0.012 ± 0.004            | 0.176 ± 0.15*                | 0.006 ± 0.002            | 0.288 ± 0.16**            |
|                            | 32 weeks    | 0.007 ± 0.002            | 0.087 ± 0.040*               | 0.0015 ± 0.013           | 0.20 ± 0.187 <sup>§</sup> |

Values are given as mean ± standard deviation in arbitrary units (target / housekeeping gene ratio). The Mann Whitney U test was applied to compare mRNA expression between wildtype and mutants at each time point in total ventricular samples. \* p < 0.05; \*\* p < 0.01, <sup>§</sup> p = 0.0519, <sup>&</sup> p = 0.0556 or 0.0653; <sup>§</sup> p = 0.0932 or p = 0.0952. The mRNA expression was assessed in left and right ventricular samples of 5 *Dsg2<sup>WT</sup>* and 5-6 *Dsg2<sup>MT</sup>* mice aged 4 weeks, in 5 *Dsg2<sup>WT</sup>* and 8 *Dsg2<sup>MT</sup>* mice aged 11-14 weeks and in 4-5 *Dsg2<sup>WT</sup>* and 5 *Dsg2<sup>MT</sup>* mice aged 29-35 weeks.

|                    |          | Total heart              |                          |        |
|--------------------|----------|--------------------------|--------------------------|--------|
|                    |          | <i>Dsg2<sup>WT</sup></i> | <i>Dsg2<sup>MT</sup></i> | P      |
|                    |          | N = 5-6                  | N = 6                    |        |
| <b><i>Spp1</i></b> | 8 weeks  | 0.004 ± 0.005            | 2.72 ± 2.51              | 0.0394 |
|                    | 12 weeks | 0.014 ± 0.02             | 5.63 ± 5.39              | 0.0112 |

Values are given as mean ± standard deviation in arbitrary units (target / housekeeping gene ratio). The Mann Whitney U test was applied to compare mRNA expression between wildtype and mutants.
